# Supplementary material for: Literature Review: Evaluation of Drug Removal Techniques in Municipal and Hospital Wastewater
Source: Int J Environ Res Public Health. 2022 Oct 12;19(20):13105. doi: 10.3390/ijerph192013105 (PMC9602914; doi:10.3390/ijerph192013105)
Supplement: Supplementary file 1 [file ijerph-19-13105-s001.zip › ijerph-1892410-supplementary.pdf]

## Supplemental Information

**Table S1.** Set of studies included in the systematic review.

| Code | Database | Scientific journal                                                | Quartile SJR | Title                                                                                                                                                                                   | Country  | Ref. | DOI                                                                                                     |
|------|----------|-------------------------------------------------------------------|--------------|-----------------------------------------------------------------------------------------------------------------------------------------------------------------------------------------|----------|------|---------------------------------------------------------------------------------------------------------|
| M01  | Scopus   | Water Research                                                    | Q1           | Nanofiltration as tertiary treatment method for removing trace pharmaceutically active compounds in wastewater from wastewater treatment plants                                         | Spain    | [27] | <a href="https://doi.org/10.1016/j.watres.2017.08.070">https://doi.org/10.1016/j.watres.2017.08.070</a> |
| M02  | Scopus   | Applied Catalysis B: Environmental                                | Q1           | Removal of antibiotics, antibiotic-resistant bacteria and their associated genes by graphene-based TiO <sub>2</sub> composite photocatalysts under solar radiation in urban wastewaters | Cyprus   | [28] | <a href="https://doi.org/10.1016/j.apcatb.2017.11.020">https://doi.org/10.1016/j.apcatb.2017.11.020</a> |
| M03  | Scopus   | Journal of Water Reuse and Desalination                           | Q1           | Evaluating occurrence of contaminants of emerging concerns in MF/RO treatment of primary effluent for water reuse – Pilot study                                                         | USA      | [29] | <a href="https://doi.org/10.2166/wrd.2019.004">https://doi.org/10.2166/wrd.2019.004</a>                 |
| M04  | Scopus   | International Journal of Environmental Research and Public Health | Q1           | Removal of Pharmaceutical and Personal Care Products (PPCPs) from Municipal Waste Water with Integrated Membrane Systems, MBR-RO/NF                                                     | China    | [30] | <a href="https://doi.org/10.3390/ijerph15020269">https://doi.org/10.3390/ijerph15020269</a>             |
| M05  | Scopus   | Water (Switzerland)                                               | Q1           | WWTP Effluent Quality Improvement for Agricultural Reuse Using an Autonomous Prototype                                                                                                  | Spain    | [31] | <a href="https://doi.org/10.3390/w12082240">https://doi.org/10.3390/w12082240</a>                       |
| M06  | Proquest | Water Science and Technology                                      | Q2           | Occurrence and elimination of antibiotics in three sewage treatment plants with different treatment technologies in Urumqi and Shihezi, Xinjiang                                        | China    | [32] | <a href="https://doi.org/10.2166/wst.2017.013">https://doi.org/10.2166/wst.2017.013</a>                 |
| M07  | Proquest | Environmental Science and Pollution Research                      | Q1           | Occurrence and behavior of pharmaceutical compounds in a Portuguese wastewater treatment plant: Removal efficiency through conventional treatment processes                             | Portugal | [33] | <a href="https://doi.org/10.1007/s11356-017-9012-7">https://doi.org/10.1007/s11356-017-9012-7</a>       |
| M08  | Proquest | Environmental Science and Pollution Research                      | Q1           | Ozonation in advanced treatment of secondary municipal wastewater effluents for the removal of micropollutants                                                                          | Turkey   | [34] | <a href="https://doi.org/10.1007/s11356-020-10339-5">https://doi.org/10.1007/s11356-020-10339-5</a>     |
| M09  | Proquest | Water (Switzerland)                                               | Q1           | Towards the Removal of Antibiotics Detected in Wastewaters in the POCTEFA Territory: Occurrence and TiO <sub>2</sub> Photocatalytic Pilot-Scale Plant Performance                       | Spain    | [35] | <a href="https://doi.org/10.3390/w12051453">https://doi.org/10.3390/w12051453</a>                       |
| M10  | Proquest | Water Science and Technology                                      | Q2           | High-rate algal pond for removal of pharmaceutical compounds from urban domestic wastewater under tropical conditions. Case study: Santiago de Cali, Colombia                           | Colombia | [36] | <a href="https://doi.org/10.2166/wst.2020.362">https://doi.org/10.2166/wst.2020.362</a>                 |

|     |               |                                      |     |                                                                                                                                                                         |             |      |                                                                                                                   |
|-----|---------------|--------------------------------------|-----|-------------------------------------------------------------------------------------------------------------------------------------------------------------------------|-------------|------|-------------------------------------------------------------------------------------------------------------------|
| M11 | Proquest      | Membranes                            | Q2  | Occurrence of Antibiotics, Antibiotic Resistance Genes and Viral Genomes in Wastewater Effluents and Their Treatment by a Pilot Scale Nanofiltration Unit               | Portugal    | [39] | <a href="https://doi.org/10.3390/membranes11010009">https://doi.org/10.3390/membranes11010009</a>                 |
| M12 | Ebsco host    | Molecules                            | Q1  | A Survey of the Presence of Pharmaceutical Residues in Wastewaters. Evaluation of Their Removal using Conventional and Natural Treatment Procedures                     | Spain       | [41] | <a href="https://doi.org/10.3390/molecules25071639">https://doi.org/10.3390/molecules25071639</a>                 |
| M13 | Sciencedirect | Journal of Hazardous Materials       | Q1  | Fate of priority pharmaceuticals and their main metabolites and transformation products in microalgae-based wastewater treatment systems                                | Spain       | [45] | <a href="https://doi.org/10.1016/j.jhazmat.2019.121771">https://doi.org/10.1016/j.jhazmat.2019.121771</a>         |
| M14 | Sciencedirect | Chemosphere                          | Q1  | Fate of active pharmaceutical ingredients in a northern high-rate algal pond fed with municipal wastewater                                                              | Sweden      | [46] | <a href="https://doi.org/10.1016/j.chemosphere.2021.129763">https://doi.org/10.1016/j.chemosphere.2021.129763</a> |
| M15 | Sciencedirect | Emerging Contaminants                | Q1  | Assessment of non-steroidal anti-inflammatory drugs from selected wastewater treatment plants in Southwestern India                                                     | India       | [47] | <a href="https://doi.org/10.1016/j.emcon.2021.01.001">https://doi.org/10.1016/j.emcon.2021.01.001</a>             |
| M16 | Sciencedirect | Science of The Total Environment     | Q1  | Occurrence and environmental impact of pharmaceutical residues from conventional and natural wastewater treatment plants in Gran Canaria (Spain)                        | Spain       | [48] | <a href="https://doi.org/10.1016/j.scitotenv.2017.05.058">https://doi.org/10.1016/j.scitotenv.2017.05.058</a>     |
| M17 | Sciencedirect | Chemosphere                          | Q1  | Comparison of different advanced treatment processes in removing endocrine disruption effects from municipal wastewater secondary effluent                              | China       | [49] | <a href="https://doi.org/10.1016/j.chemosphere.2016.10.031">https://doi.org/10.1016/j.chemosphere.2016.10.031</a> |
| M18 | Sciencedirect | Chemical Engineering Journal         | Q1  | Removal of emerging contaminants from a primary effluent of municipal wastewater by means of sequential biological degradation-solar photocatalytic oxidation processes | Spain       | [50] | <a href="https://doi.org/10.1016/j.cej.2016.01.022">https://doi.org/10.1016/j.cej.2016.01.022</a>                 |
| M19 | Sciencedirect | Chemical Engineering Journal         | Q1  | Pharmaceutical biological degradation, sorption and mass balance determination in a conventional activated-sludge wastewater treatment plant from Murcia, Spain         | Spain       | [51] | <a href="https://doi.org/10.1016/j.cej.2017.01.048">https://doi.org/10.1016/j.cej.2017.01.048</a>                 |
| M20 | Sciencedirect | Journal of Water Process Engineering | Q1  | Fate evaluation of pharmaceuticals in solid and liquid phases at biological process of full-scale municipal wastewater treatment plants                                 | South Korea | [52] | <a href="https://doi.org/10.1016/j.jwpe.2021.102538">https://doi.org/10.1016/j.jwpe.2021.102538</a>               |
| M21 | Sciencedirect | Science of The Total Environment     | Q1  | Assessing membrane fouling and the performance of pilot-scale membrane bioreactor (MBR) to treat real municipal wastewater during winter season in Nordic regions       | Finland     | [53] | <a href="https://doi.org/10.1016/j.scitotenv.2016.11.122">https://doi.org/10.1016/j.scitotenv.2016.11.122</a>     |
| H01 | Scopus        | Environmental Research               | Q 1 | Assessment of multiclass pharmaceutical active compounds (PhACs) in hospital WWTP influent and effluent samples by UHPLC-Orbitrap                                       | Greece      | [23] | <a href="https://doi.org/10.1016/j.envres.2020.110152">https://doi.org/10.1016/j.envres.2020.110152</a>           |

|     |            |                                                        |    |                                                                                                                                                                                        |              |      |                                                                                                           |
|-----|------------|--------------------------------------------------------|----|----------------------------------------------------------------------------------------------------------------------------------------------------------------------------------------|--------------|------|-----------------------------------------------------------------------------------------------------------|
|     |            |                                                        |    | MS: Temporal variation, removals, and environmental risk assessment                                                                                                                    |              |      |                                                                                                           |
| H02 | Scopus     | Journal of Toxicology - Hindawi                        | Q2 | Assessment of Pharmaceuticals, Personal Care Products, and Hormones in Wastewater Treatment Plants Receiving Inflows from Health Facilities in North West Province, South Africa       | South Africa | [24] | <a href="https://doi.org/10.1155/2018/3751930">https://doi.org/10.1155/2018/3751930</a>                   |
| H03 | Scopus     | Chemical Engineering Journal                           | Q1 | Removal of pharmaceuticals, toxicity, and natural fluorescence through the ozonation of biologically-treated hospital wastewater, with further polishing via a suspended biofilm       | Denmark      | [25] | <a href="https://doi.org/10.1016/j.cej.2018.11.112">https://doi.org/10.1016/j.cej.2018.11.112</a>         |
| H04 | Scopus     | Environmental Science and Pollution Research           | Q1 | Investigating the removal of some pharmaceutical compounds in hospital wastewater treatment plants operating in Saudi Arabia                                                           | Saudi Arabia | [26] | <a href="https://doi.org/10.1007/s11356-016-6389-7">https://doi.org/10.1007/s11356-016-6389-7</a>         |
| H05 | Proquest   | Environmental Monitoring and Assessment                | Q2 | Occurrence of antibiotics residues in hospital wastewater, wastewater treatment plant, and surface water in Nairobi County, Kenya                                                      | Kenya        | [37] | <a href="https://doi.org/10.1007/s10661-019-7952-8">https://doi.org/10.1007/s10661-019-7952-8</a>         |
| H06 | Proquest   | Archives of Environmental Contamination and Toxicology | Q2 | QuEChERS Approach for the Analysis of Three Fluoroquinolone Antibiotics in Wastewater: Concentration Profiles and Ecological Risk in Two Nigerian Hospital Wastewater Treatment Plants | Nigeria      | [38] | <a href="https://doi.org/10.1007/s00244-020-00789-w">https://doi.org/10.1007/s00244-020-00789-w</a>       |
| H07 | Proquest   | Environmental Science and Pollution Research           | Q1 | Non-antimicrobial pharmaceuticals can affect the development of antibiotic resistance in hospital wastewater                                                                           | Slovakia     | [40] | <a href="https://doi.org/10.1007/s11356-020-07950-x">https://doi.org/10.1007/s11356-020-07950-x</a>       |
| H08 | Ebsco host | Archives of Environmental Contamination and Toxicology | Q2 | Analysis, Occurrence, and Ecological Risk Assessment of Diclofenac and Ibuprofen Residues in Wastewater from Three Wastewater Treatment Plants in South-Western Nigeria                | Nigeria      | [42] | <a href="https://doi.org/10.1414/jasem.v25i3.5">https://doi.org/10.1414/jasem.v25i3.5</a>                 |
| H09 | Ebsco host | Chemical Engineering Communications                    | Q2 | Photocatalytic degradation of ciprofloxacin antibiotic by TiO <sub>2</sub> nanoparticles immobilized on a glass plate                                                                  | Iran         | [43] | <a href="https://doi.org/10.1080/00986445.2019.1573168">https://doi.org/10.1080/00986445.2019.1573168</a> |
| H10 | Sciadirect | Environmental Pollution                                | Q1 | Determination of metals and pharmaceutical compounds released in hospital wastewater from Toluca, Mexico, and evaluation of their toxic impact                                         | Mexico       | [44] | <a href="https://doi.org/10.1016/j.envpol.2018.04.116">https://doi.org/10.1016/j.envpol.2018.04.116</a>   |
